# Supplementary material for: Regulation of saturation magnetization of magnetite by doping with group III elements
Source: Royal Society of Chemistry journal article supplement (doi:10.1039/d3cp03789d), 2023-01-01
Supplement: d3cp03789d1.pdf [file d3cp03789d1.pdf]

## Electronic Supplementary Information

### Regulation of Saturation Magnetization of Magnetite by Doping with Group III Elements

Yanying Ren<sup>1</sup>, Yaning Li<sup>2</sup>, Nan Xu<sup>1</sup>, Kun Guo<sup>1</sup>, Zhaohui Xu<sup>1</sup>, Xin Chen<sup>1\*</sup>,  
Hongsheng Liu<sup>2\*</sup>, Jufeng Gao<sup>2</sup>

1. *The Second Hospital of Dalian Medical University, Dalian 116024, China.*

2. *Department of Physics, Dalian University of Technology, Dalian 116024,  
China.*

email: [chenxincjz@gmail.com](mailto:chenxincjz@gmail.com); [liuhongsheng@dlut.edu.cn](mailto:liuhongsheng@dlut.edu.cn)

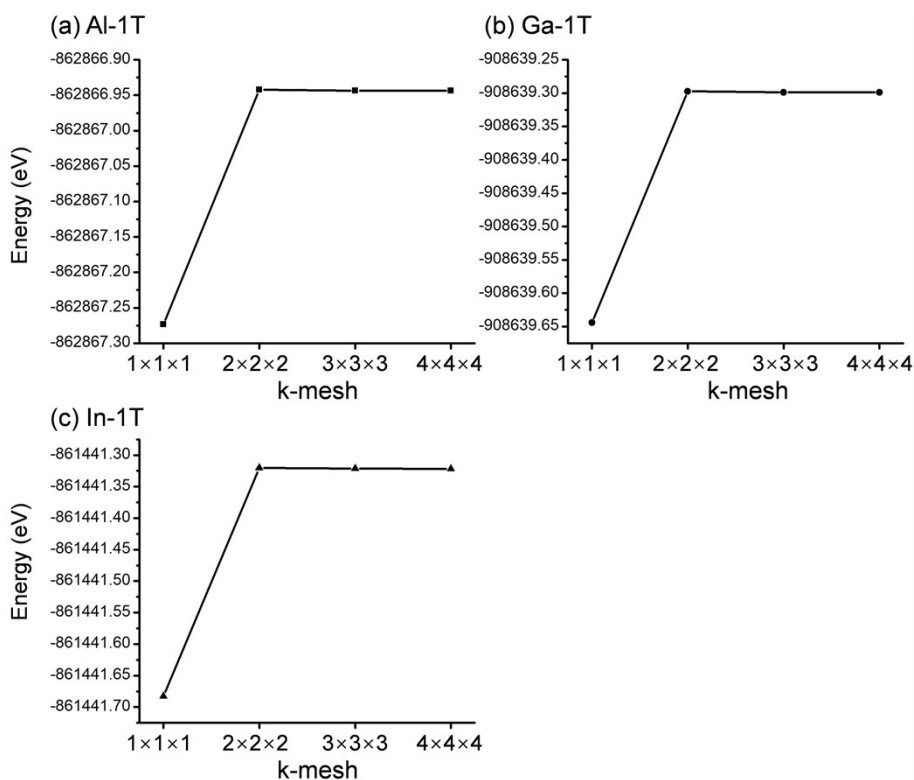

**Figure S1.** The total energy as a function of k-mesh sampling for doped Fe<sub>3</sub>O<sub>4</sub>: (a) one Al atom replacing one tetrahedral Fe atom; (b) one Ga atom replacing one tetrahedral Fe atom; (c) one In atom replacing one tetrahedral Fe atom. The results show that 3 × 3 × 3 k-mesh sampling is enough for convergence.

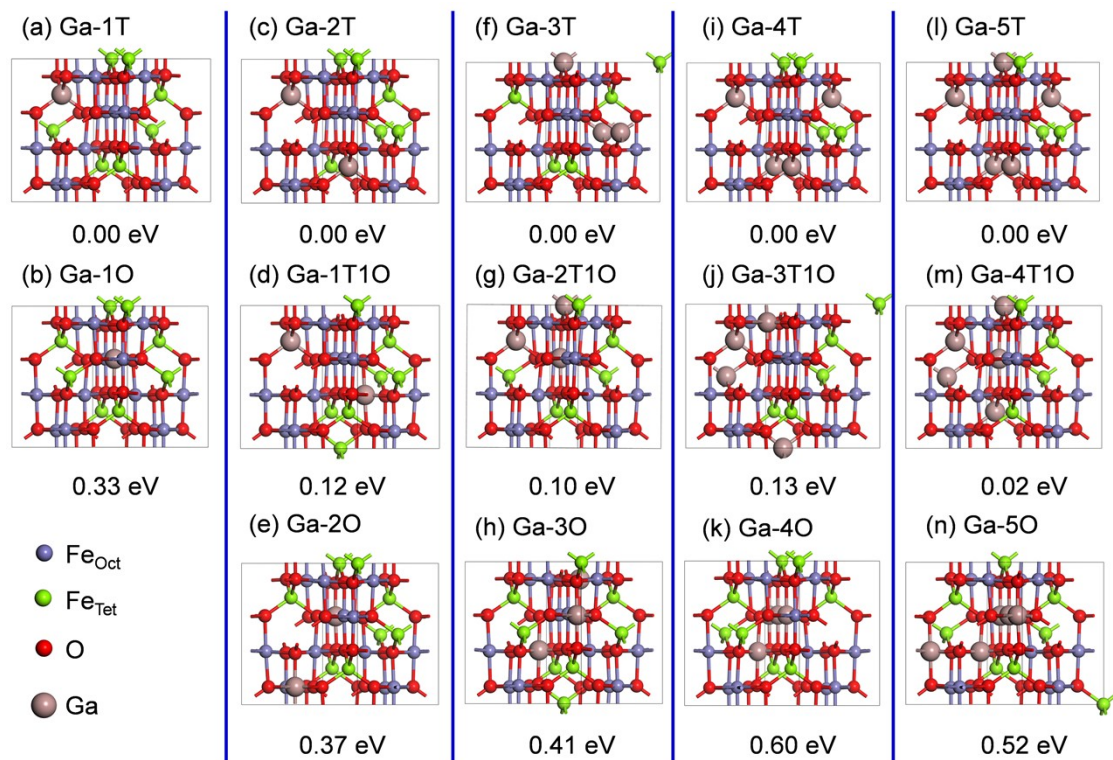

**Figure S2.** Optimized structures of  $\text{Fe}_3\text{O}_4$  doped with different number of Ga atoms (from one to five). For each column, the number of doped Ga atoms is the same. At each doping concentration, the relative energy with respect to the case that all Ga atoms replace tetrahedral Fe atoms is listed below each structure. The label Ga-mTnO (m and n are integers) means that m Ga atoms replace  $\text{Fe}_{\text{Tet}}$  and n Al atoms replace  $\text{Fe}_{\text{Oct}}$ .

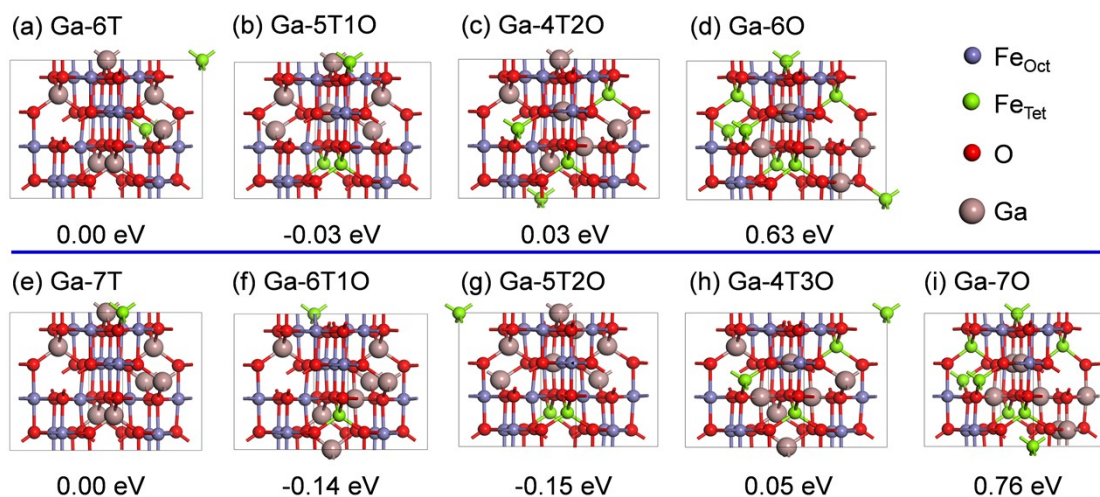

**Figure S3.** Optimized structures of  $\text{Fe}_3\text{O}_4$  doped with different number of Ga atoms (from six to seven). For each column, the number of doped Ga atoms is the same. At each doping concentration, the relative energy with respect to the case that all Ga atoms replace tetrahedral Fe atoms is listed below each structure. The label Ga-mTnO (m and n are integers) means that m Ga atoms replace  $\text{Fe}_{\text{Tet}}$  and n Al atoms replace  $\text{Fe}_{\text{Oct}}$ .

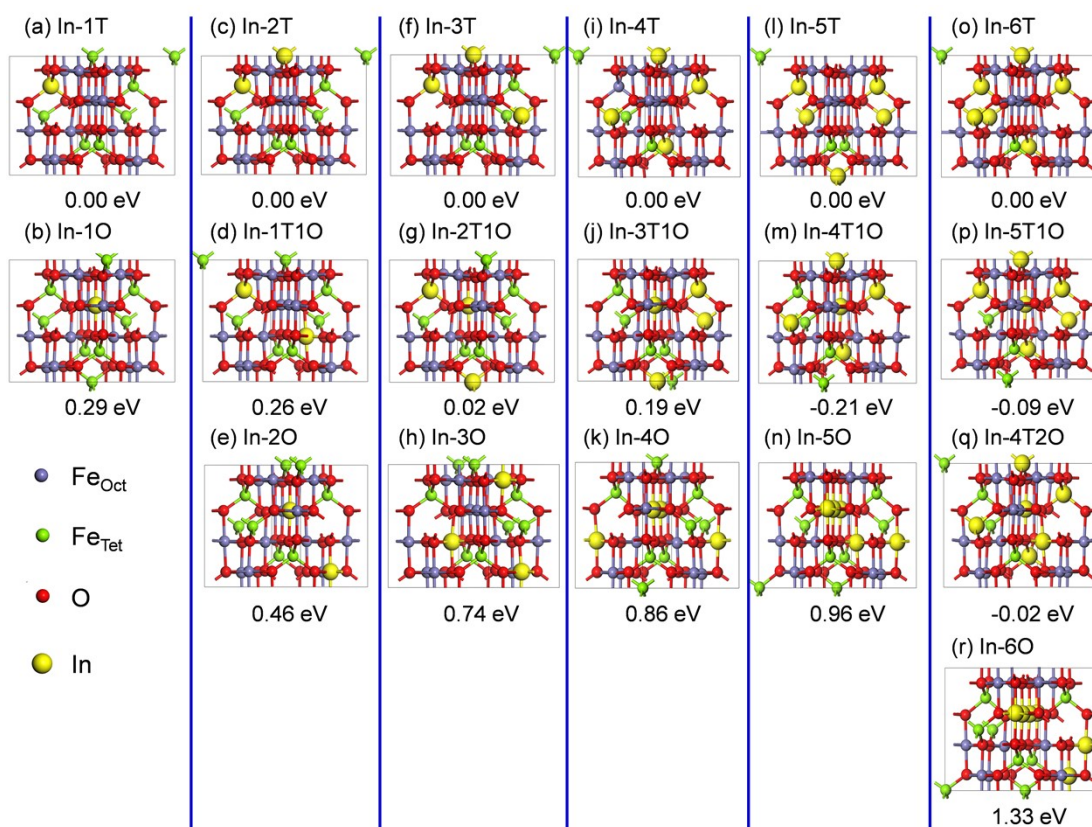

**Figure S4.** Optimized structures of  $\text{Fe}_3\text{O}_4$  doped with different number of In atoms (from one to six). For each column, the number of doped In atoms is the same. At each doping concentration, the relative energy with respect to the case that all In atoms replace tetrahedral Fe atoms is listed below each structure. The label In- $m$ T $n$ O ( $m$  and  $n$  are integers) means that  $m$  In atoms replace  $\text{Fe}_{\text{Tet}}$  and  $n$  In atoms replace  $\text{Fe}_{\text{Oct}}$ .

For each configuration shown in Figure 2, S2, S3 and S4, several different structures were considered and the structure with the lowest energy was shown. For one dopant per cell, only one possible configuration for substituting  $\text{Fe}_{\text{Tet}}$  or  $\text{Fe}_{\text{Oct}}$ . For two dopants per cell, two configurations are considered for X-2T, X-1T1O and X-2O ( $X = \text{Al}, \text{Ga}, \text{In}$ ), respectively. One case is that the two dopants are as close to each other and the other case is that the two dopants are far away from each other. For three and more dopants per cell, it is difficult to exhaust all configurations. Therefore, at least three configurations were chosen randomly. The energy difference ranges from a few meV to several tens of meV. In this case, we cannot guarantee the report configuration is the lowest energy configuration. However, the trend that at low concentration Al, Ga or In prefers tetrahedral sites and after a critical concentration, subsequent dopants prefer

octahedral sites should be correct (shown in Figure 3a, 5a and 5c).

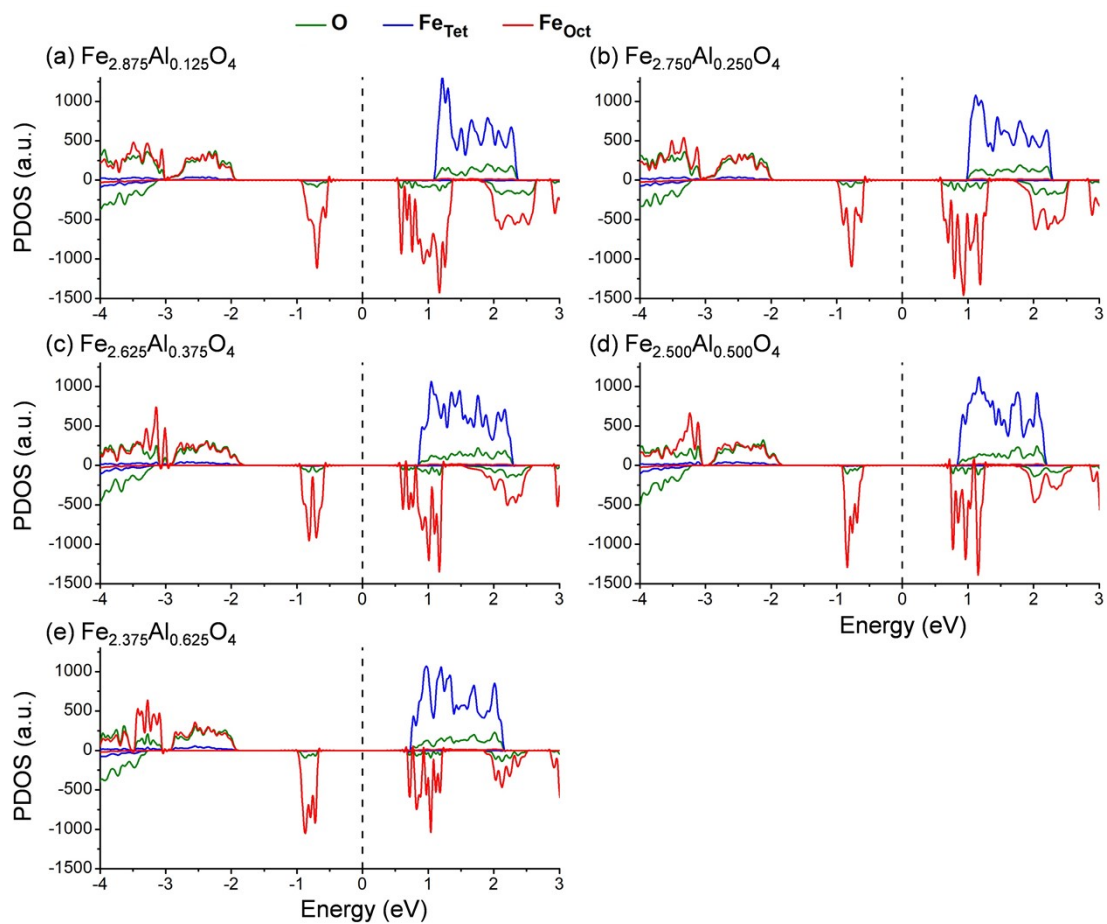

**Figure S5.** Projected density of states of Al-doped  $\text{Fe}_3\text{O}_4$  at different Al concentration. The legend of colors is on the top. The Fermi level is scaled to zero as indicated by the dashed black lines.

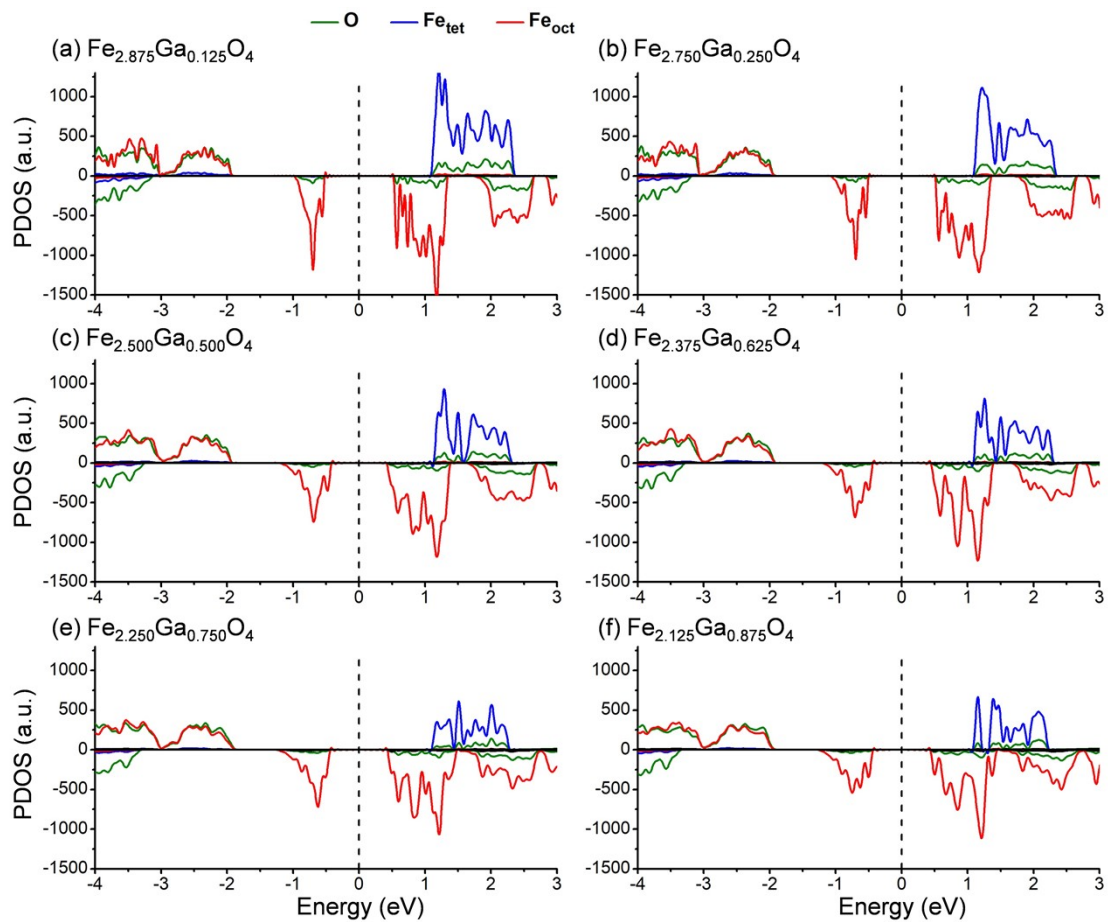

**Figure S6.** Projected density of states of Ga-doped  $\text{Fe}_3\text{O}_4$  at different Ga concentration. The legend of colors is on the top. The Fermi level is scaled to zero as indicated by the dashed black lines.

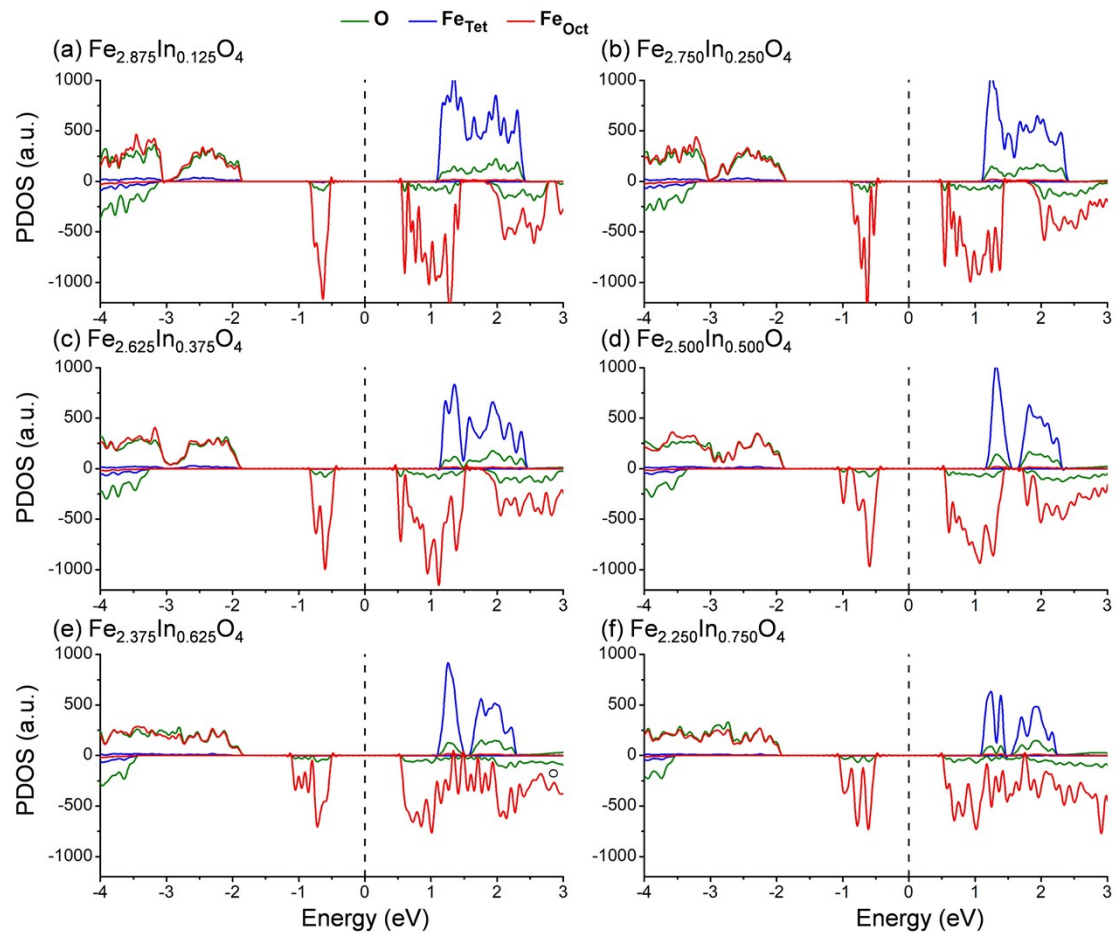

**Figure S7.** Projected density of states of In-doped  $\text{Fe}_3\text{O}_4$  at different In concentration. The legend of colors is on the top. The Fermi level is scaled to zero as indicated by the dashed black lines.

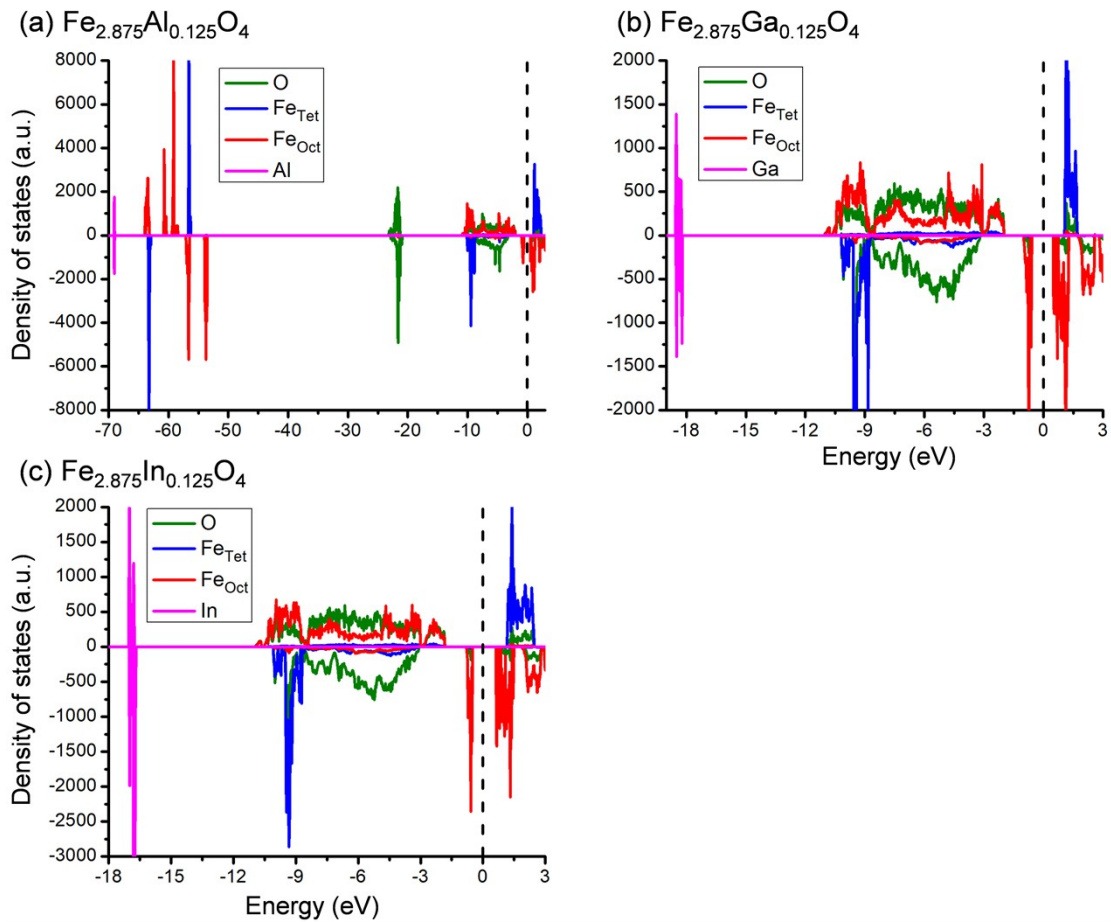

**Figure S8.** Projected density of states of (a)  $\text{Fe}_{2.875}\text{Al}_{0.125}\text{O}_4$ , (b)  $\text{Fe}_{2.875}\text{Ga}_{0.125}\text{O}_4$  and (c)  $\text{Fe}_{2.875}\text{In}_{0.125}\text{O}_4$  at a large range of energy. The Fermi level is scaled to zero as indicated by the dashed black lines.

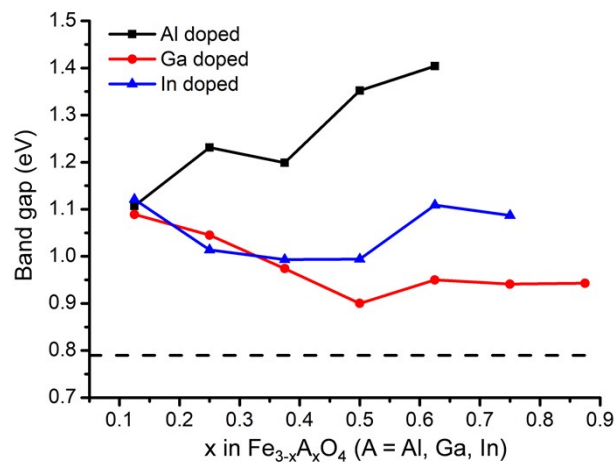

**Figure S9.** Band gap of  $\text{Fe}_3\text{O}_4$  doped with group III elements (Al, Ga, In) as a function of doping concentration. The black dash line indicates the band gap value of  $\text{Fe}_3\text{O}_4$  without doping.



**Table S1.** Relative energy for different configurations of  $\text{Fe}_{2.125}\text{Ga}_{0.875}\text{O}_4$ . The label Ga-mTnO (m and n are integers) means that m Ga atoms replace  $\text{Fe}_{\text{Tet}}$  and n Ga atoms replace  $\text{Fe}_{\text{Oct}}$ .

|              | Energy (eV) |         |         |         |       |
|--------------|-------------|---------|---------|---------|-------|
|              | Ga-7T       | Ga-6T1O | Ga-5T2O | Ga-4T3O | Ga-7O |
| Fixed cell   | 0.000       | -0.136  | -0.146  | 0.052   | 0.759 |
| Relaxed cell | 0.000       | -0.151  | -0.170  | -0.045  | 0.764 |
